# Supplementary material for: Gene drive and resilience through renewal with next generation Cleave and Rescue selfish genetic elements
Source: PubMed Central journal article supplement — Proc Natl Acad Sci U S A. 2020 Apr 3;117(16):9013–21. doi: 10.1073/pnas.1921698117 (PMC7183144; doi:10.1073/pnas.1921698117), 2020-04-03
Supplement: pnas.1921698117.sapp.pdf [file pnas.1921698117.sapp.pdf]

## Supplementary Information for

### Gene drive, and resilience through renewal with next generation *Cleave and Rescue* selfish genetic elements

Georg Oberhofer, Tobin Ivy, Bruce A. Hay

This PDF file includes:

Fig. S1 to S9

Table S1 to S12

**Other Supplementary Materials for this manuscript include the following:**

Dataset S1. **DataS1.xlsx**; primer sequences, gRNA sequences, *ClvR* constructs GenBank files  
Dataset S2. **DataS2.xlsx**; genotype count table for drive experiments.

## Supplementary Figures

### A) Rescue constructs (*ClvR*<sup>n+1</sup>), *dbe-A*, *TfIIA-S-A*

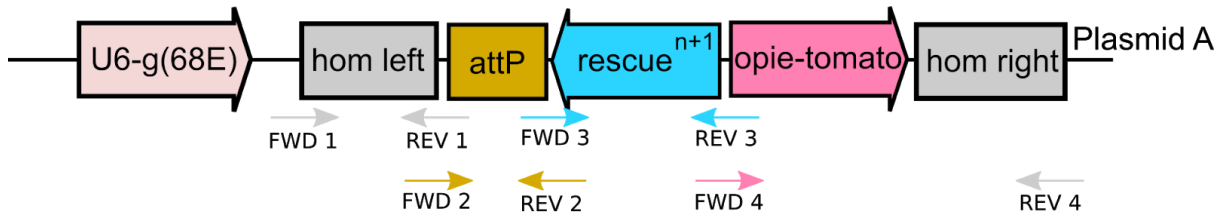

### B) Cleaver constructs, *dbe-B*, *TfIIA-S-B*

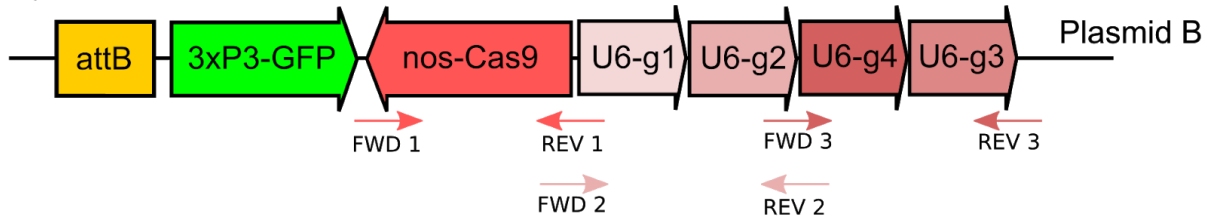

### C) Rescue<sup>n</sup> donor plasmids, *tko-C*, *dbe-C*

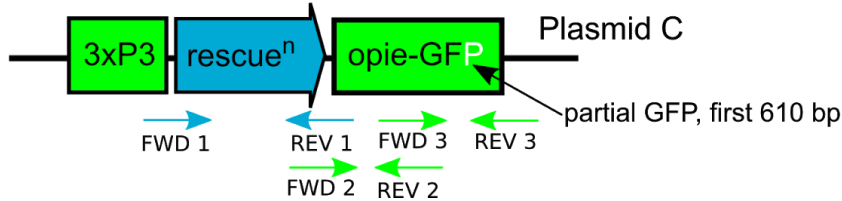

**Fig. S1. Constructs used to create 1st and 2nd generation *ClvR* flies.** Schematic representation of *ClvR* constructs including primers used for cloning. Primer sequences are in Dataset S1. **(A)** *Rescue* constructs including the *Rescue* gene, a *td-tomato* marker and an *attP* site, flanked by homology arms to facilitate insertion into the fly genome at 68E on the third chromosome. The gRNA to target 68E was driven from a U6 promoter located outside of the homology arms. **(B)** *Cleaver* constructs having an *attB* site, a *3xP3-GFP* marker gene, germline Cas9 under the control of the *nanos* promoter and UTRs, as well as a set of 4 gRNAs each driven by a U6 promoter. **(C)** *Rescue*<sup>n</sup> donor plasmid having a *3xP3* promoter serving as homology arm, the *Rescue*<sup>n</sup> gene, a ubiquitous *opie* promoter and a partial GFP ORF (110 bp +UTR (SV40) missing the C-terminus of GFP served as the other homology arm.

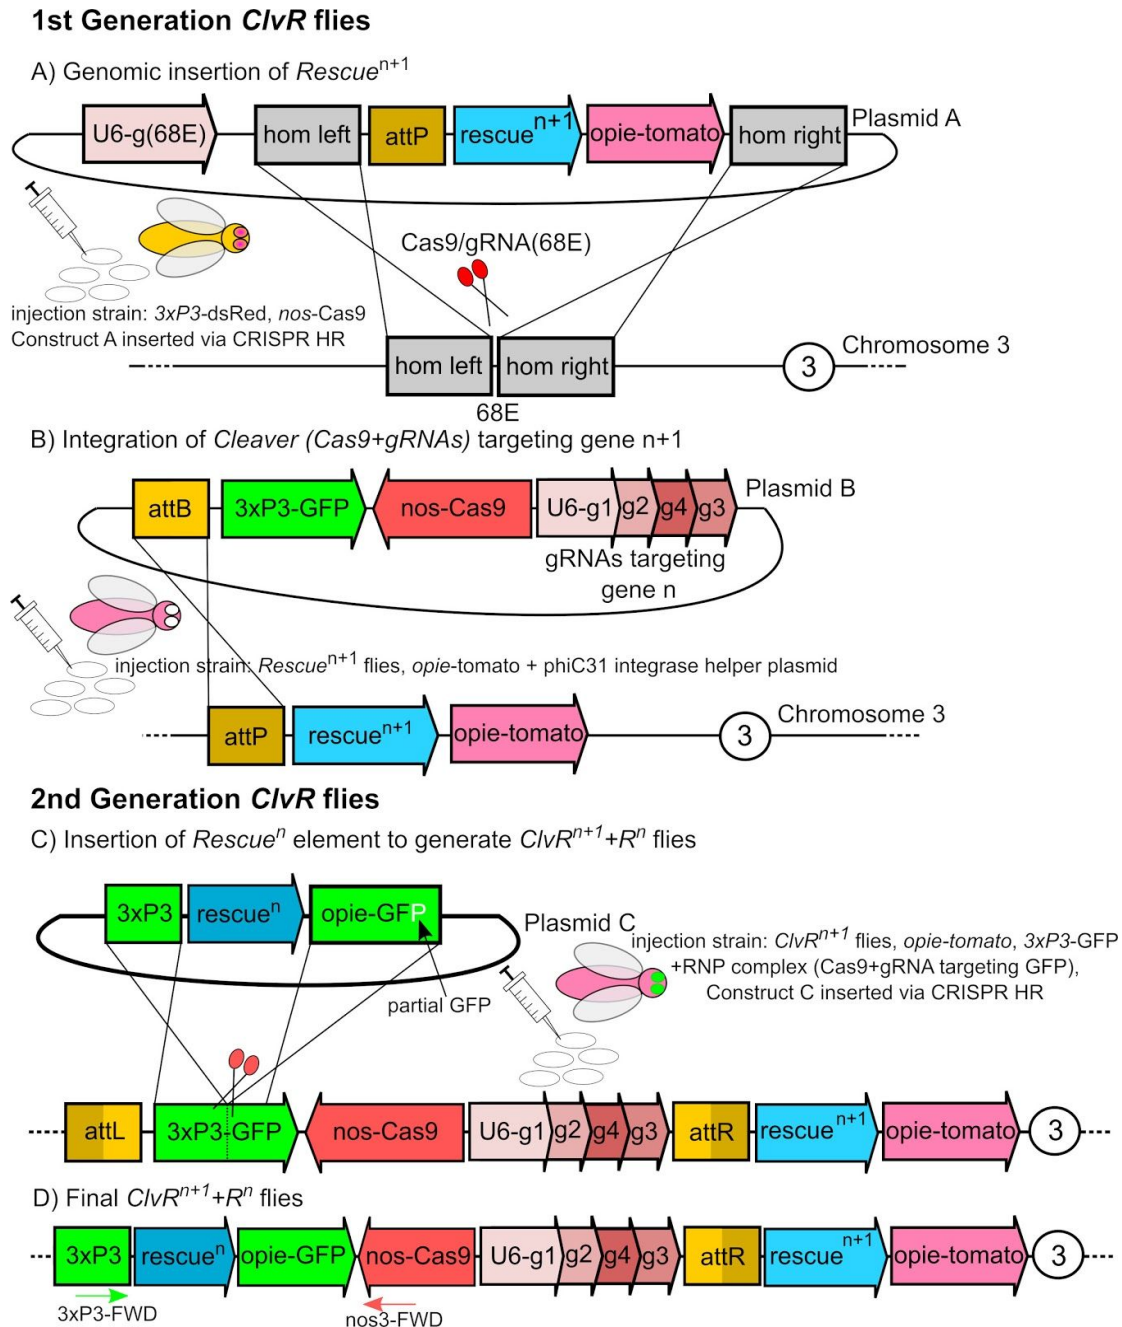

**Fig. S2. Synthesis strategy to create 1st and 2nd generation *ClvR* flies. (A) CRISPR HR mediated insertion of *Rescue*<sup>n+1</sup>.** Plasmid A having the *Rescue*<sup>n+1</sup> and a marker was injected into a strain expressing Cas9 in the germline (*nos-Cas9*). A gRNA targeting a genomic region at 68E was expressed from the plasmid outside the homology arms. **(B) *PhiC31* mediated integration of *Cleaver*<sup>n+1</sup> (*Cas9* and *gRNAs*).** Plasmid B having Cas9 and gRNAs targeting essential gene (n+1) was injected into flies from step A with a helper plasmid as the source for *phiC31* integrase. **(C) CRISPR HR mediated insertion of *Rescue*<sup>n</sup> into flies that will become *ClvR*<sup>n+1</sup>+*R*<sup>n</sup> flies.** Cas9/gRNA RNP complexes were injected to induce a DSB between the 3xP3 promoter and GFP alongside a donor template that had the *Rescue*<sup>n</sup>. The homology arms were designed in a way so that successful insertion will switch GFP expression from eye-specific to ubiquitous. **(D) Final *ClvR*<sup>n+1</sup>+*R*<sup>n</sup> flies.** These flies were used in the gene drive experiments to replace populations carrying *ClvR*<sup>n</sup> elements. Red and green arrows indicate primers that were used to confirm correct insertion of the new *Rescue*<sup>n</sup>.

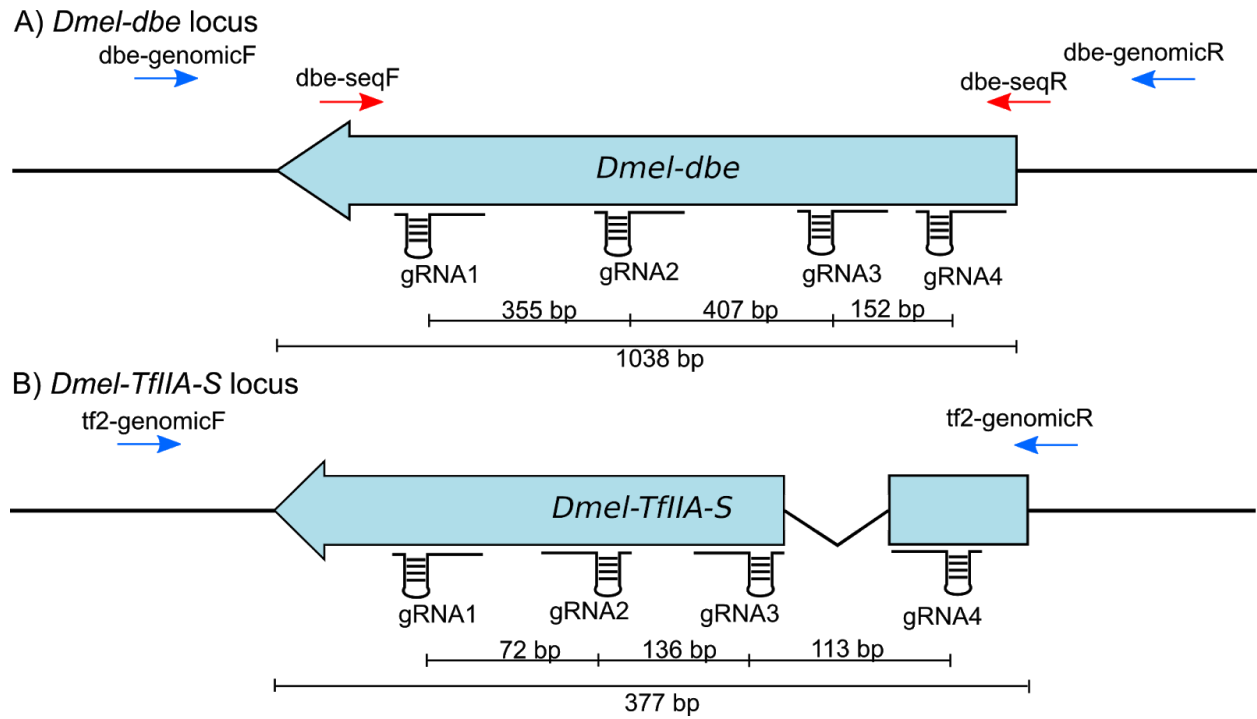

**Fig. S3. Schematic of target genes genomic loci.** Shown are exons (blue) and introns of the two *ClvR* target genes with gRNA binding sites and directions, primers used for sequencing, and scale bars giving distances in bp. (A) *Dmel-dbe* locus (B) *Dmel-TfIIA-S* locus

Start

Dsuz-dbe cga--aataATGagcgacagcgaagcggaagacactaaagttagcacggagccggtggac  
Dme1-dbe cgagtaacgatgagcgaagtggaagcggaggagacaaaatcagcaccgagccggtggac  
\*\*\* \*\* . \*\*\*\*\* \*\* . \*\*\*\*\* . \*\* \*\* . \*\* . \* . \*\*\*\*\* \*\*\*\*\*

Dsuz-dbe aatgctggtggccatgaagatcccggctttcaagcaggaggacaacccgcacggcatggtg  
Dme1-dbe aatgctggtggccatgaagatcccgccttcaaggcaggaggacaacccgcatGGGatggtg  
\*\*\*\*\* \*\*\*\*\* \*\* . \*\* . \*\*\*\*\* \*\*\*\*\* . \*\* \*\*\*\*\*  
gRNA4

Dsuz-dbe gaagagagctccttcgccacgctgttcccaaataccgggagcgatattcaaggaggtc  
Dme1-dbe gaggagagctccttcgccacgctgttcccaaatatcgggagcgctattcaaggaggtt  
\*\* . \*\*\*\*\* . \*\*\*\*\* . \*\*\*\*\* \*\*\*\*\* . \*\*\*\*\* .

Dsuz-dbe tggcccctggtggagcagtgcttggaggagcaccacctaaggcgggaactggacctgatg  
Dme1-dbe tggcctctggtggagcagtgcttggcggagcaccacctaaggcgggagctagattgatg  
\*\*\*\*\* . \*\*\*\*\* . \*\* \* \*\*\*\*\* . \*\*\*\*\* . \*\* . \*\* . \*\*\*\*\*  
gRNA3

Dsuz-dbe gagggcagcatggtggtgaagaccagtcgtaagacctgggaccctacatcattatcaag  
Dme1-dbe gagGGGagcatggtggtgaagaccagtcgcaagacctgggatccctacatcatcaag  
\*\*\*\*\* \*\*\*\*\* . \*\*\*\*\* . \*\*\*\*\* . \*\*\*\*\*

Dsuz-dbe gcgagggacatgatcaagctgatggccaggagtgtgccctttgagcaggccaagcgggtc  
Dme1-dbe gcgagggacatgatcaagctgatggccaggagtgtgccctttgagcaggccaagcgggtc  
\*\*\* \*\* . \*\*\*\*\* . \*\*\*\*\* \*\*\*\*\* . \*\*\*\*\* . \*\*\*\*\*

Dsuz-dbe ctgcaggatgacattgggtgacatcatcaaatcggcaatctagtccacaagaaggag  
Dme1-dbe ctgcaggacgacattgggtgacatcatcaaatcggcaatctagtccacaagaaggag  
\*\*\*\*\* . \*\*\*\*\* . \*\*\*\*\* \*\*\*\*\* \*\* . \*\* \* \*\*\*\*\*

Dsuz-dbe aagttcgtgaagcggcgccagcgtttgatagggccaacggagccaccctgaagtccatc  
Dme1-dbe aagttcgtgaagcggcgccagcgtttgatagggccaacggagccaccctgaagtccatc  
\*\*\*\*\* \*\*\*\*\* \*\* . \*\* . \*\*\*\*\* \*\*\*\*\* \*\*\*\*\* .

Dsuz-dbe gaactgcttaccgactgctatgttctggtacaaggaacaccgtctccgcttgggtcca  
Dme1-dbe gaactgctcaccgattgctacgttttgggtcaaggaacaccagctctccgcttgggtcca  
\*\*\*\*\* . \*\*\*\*\* . \*\*\*\*\* . \*\* . \*\* \* \*\*\*\*\* \*\*\*\*\*

Dsuz-dbe tacaagggcctcagcaggtgcccgatattgtcctggaacaatgaacaatgtgcatccc  
Dme1-dbe tacaagggcctcagcaggtgcccgatattgtcctggaacaatgaacaatgtgcatccc  
\*\*\*\*\* . \*\*\*\*\* \*\*\*\*\* \*\*\*\*\* . \*\* \*\*\*\*\* . \*\* \*  
gRNA2

Dsuz-dbe atatacaacatcaaggccctgatgatcaagcgcgagctgatgaaggatccccgcctggcc  
Dme1-dbe atatacaacatcaaggccctgatgatcaagCGGgagctgatgaaggatccccgcctggcc  
\*\*\*\*\* . \*\*\*\*\* . \*\*\*\*\* \*\*\*\*\* \*\*\*\*\* \*\* . \*\*\*\*\*

Dsuz-dbe aacgaggattggtctaggttctcgcgaagttcaagaacaagaacatcagcaaacgcaag  
Dme1-dbe aacgaggactggtcccgatctcgcgaagttcaagaacaaaacattagcaaacgcaag  
\*\*\*\*\* . \*\*\*\*\* . \* . \*\*\*\*\* \*\*\*\*\* \*\*\*\*\* . \*\*\*\*\* . \*\*\*\*\*

Dsuz-dbe cagccgaaggtgaagaagcagaagaaggagtacactccattcccgccagccagccggag  
Dme1-dbe cagccgaaggtcaagaagcaagaaggagtacacccattcccgccagccagccggag  
\*\*\*\*\* \*\*\*\*\* . \*\*\*\*\* \*\*\*\*\* . \*\*\*\*\* \*\*\*\*\*

Dsuz-dbe agcaaggtggacaagcagctggccagcggagagtacttctcaaccaggagcagaagcag  
Dme1-dbe agcaaggtggacaagcagctggccagcggagagtacttctcaaccaggagcagaagcag  
\*\*\*\*\* \*\*\*\*\* . \*\*\*\*\* \*\*\*\*\*

Dsuz-dbe gccaaagcgaaccaggagcgcaccgaaaagcagaaggaggcggccaagcgcaggggcgag  
Dme1-dbe gccaaagcgaaccaggagcgcaccgaaaagcagaaggaggcggccaagcgcaggggcgag  
\*\* \*\*\*\*\* \*\*\*\*\* . \*\* .

```

Dsuz-dbe      cgccgcaacaaggactttgtgccgccacggaggagtctgcatcttcgaatcggaagaag
Dmel-dbe      cgccgaacaaggactttgtcccgccacggaggagtcagctgcttcaagtcggaagaag
                ***** ***** ***** **  ****.*.*****
                                     gRNA1
Dsuz-dbe      gaggatgcctcctccacgagcaaggtggacgtgaaggccctcaaggccaagctgatcaag
Dmel-dbe      gaggaTGGctcctcctccagcaaggtggacgtgaaggccctgaaggccaagctgatcaag
                ***** ***** * ***** ***** *****
                                     Stop
Dsuz-dbe      gccacaagaaggcgagg---agcTGAtagttttcatagttttaattagccataggatta
Dmel-dbe      gccacaagaaggcgaggagcagctgatagttttcctagttttaattagtagtaggacct
                ***** ***** ***** .*****..

```

**Fig. S4. Alignment of *dbe* target region with the *Rescue* fragment.** Shown is the DNA sequence alignment of the *dbe* locus gRNA target sites in *D. melanogaster* with the *Rescue* fragment from *D. suzukii*. Note how the gRNAs can only target the *D. melanogaster* locus. CDS in green, Start/Stop in uppercase, gRNA target sites including PAM in yellow, PAM in uppercase.

```

Dmel-Tf2      gctgttccgctcgaattaaggcagccactatgtcgtatcaactgtaccgcaacaccacgc
Dsuz-Tf2      ggcatt-----aaaaaacagagcagccATGtcctatcaactttaccgcaataccacgc
*  .**          ** ** . *** .*.***** ***** *****.******
          gRNA4
Dmel-Tf2      tcggcaacaCCctgcaggagagcctcgacgagctgattcaggtgagtt---cgc-----
Dsuz-Tf2      tcggcaacaactgcaggagagcctcgatgagctgattcaggtgagctatgcccacaa
*****.******.******.******.******.******.*
          gRNA3
Dmel-Tf2      ---gctggcgaagtgaaacgcattgtaat---ggccttccatattgcagtacggCCA
Dsuz-Tf2      tatggctgtccaaacagaacgtattgtaat---cccattccatattgtagtacggcca
          **** * **...*****.******.* *****.******.*
          gRNA3
Dmel-Tf2      gattacgccggactggccttcaaggcttctgctgcaattcgacaagagcatcaacaatgc
Dsuz-Tf2      gatcacaccggattggccttcaaggctgctgctgacagagcatcaacaatgc
*****.******.******.******.******.******.*
          gRNA2
Dmel-Tf2      cctaaaccagcgggtcaaggccgcgtcaccttcaaggctggaaaactaaacaCCTaccg
Dsuz-Tf2      cctcaaccagcgggtcaaggccgcgtaaccttcaaggctggaaaactgaacacataccg
          **** ******.******.******.******.******.*
          gRNA2
Dmel-Tf2      cttctgcgacaatgtctggactctcatgcttaacgatgtggagttccgcgaagtgcacga
Dsuz-Tf2      cttctgcgataatgtctggaccctcatgctcaacgatgtggagttccgcgaggtccacga
*****.******.******.******.******.******.*** ****
          gatcgtcaAGG
Dmel-Tf2      gatcgtcaAGGtggaacaaggtgaagatcgtggcctgacgacggcaagagcggcgagttctg
Dsuz-Tf2      gttcgtcaaggtggaacaaggtcaagatcgtggcctgacgacggcaagagcggcgagttctg
* *****.******.******.******.******.******.*
          aacaccaccgaccgatctgaacaccaatgtaaccccactaaacacaccatgtaacccc
Dmel-Tf2      aacaccaccgaccgatctgaacaccaatgtaaccccactaaacacaccatgtaacccc
Dsuz-Tf2      agcaccaccgatccgatcTGAgccccatatac-----
*.******.******.* ** **.*

```

**Fig. S5. Alignment of *TfIIA-S* target region with the *Rescue* fragment.** Shown is the DNA sequence alignment of the *TfIIA-S* locus gRNA target sites in *D. melanogaster* with the *Rescue* fragment from *D. suzukii*. Note how the gRNAs can only target the *D. melanogaster* locus. CDS in green, Start/Stop in uppercase, gRNA target sites including PAM in yellow, PAM in uppercase.

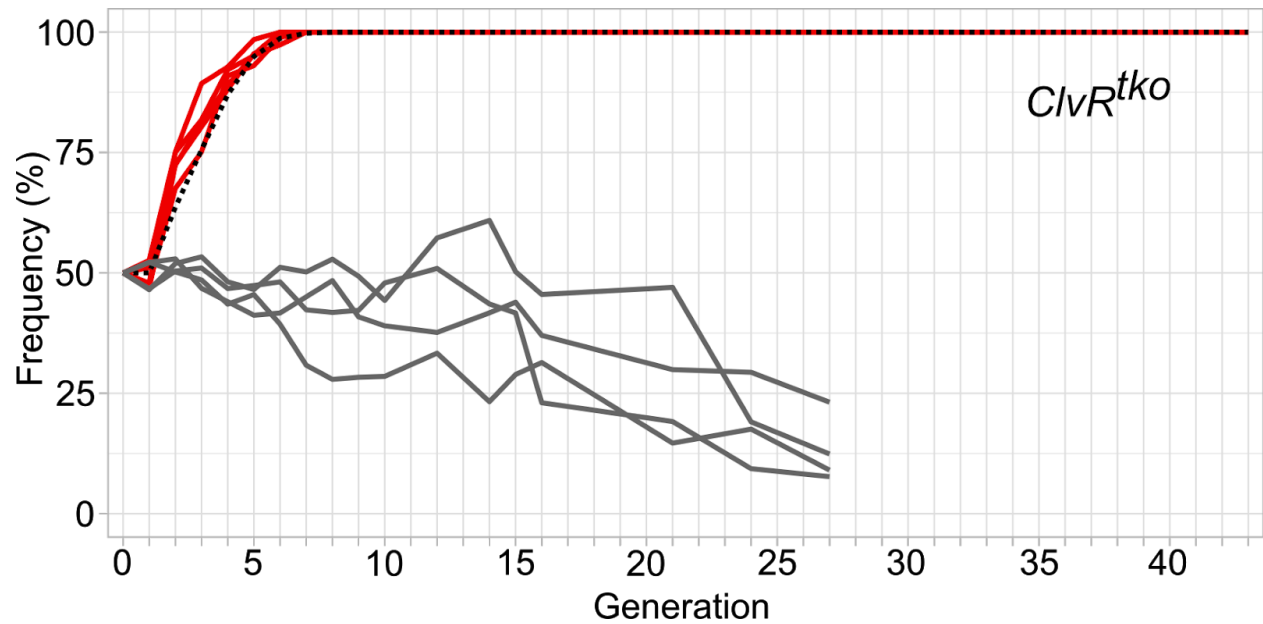

**Fig. S6. Continuation of a  $ClvR^{tko}$  gene drive experiment reported in (25).** Red lines represent drive data from five replicates. Grey lines show data from control experiments in which a construct carrying only the *tko Rescue* and a dominant marker was introduced into a  $w^{1118}$  population. Dotted black line shows model behavior for an element with no fitness cost. Data from ref. (25) (generation 0-18).



>*Dsuz-TfIIA-S* rescue fragment

```
tgftccataatgcatgctgctgttccagaagatggattgaccaagatgctggggaagaagccatggagatctc gatgtaggctgctcaagtacagggaaactggctccactccaagg
aaaaagttcagccttgggtgccagcaggaagaagattggaattcgcagagaccaaagccaaa gtttggaaaacgccaaggctcttcaaatgccgctctatatgacattccgatt
agaaatatgacggaaftctcctgtaataattatcaaatattacgtttaaacaatatgtgtcttacaatacttcttaaatgtattattgtataacaacgggtgattcataattcaaatgtttaaata
actgggtgagaagtgccgccccctgggtggtatatttctgactgaactctacatactttaccatattacaattttatcaaatgaatgattagaatgattataaattcaattaaatgtatcttca
aaataaatctaaaacggatttaaaaaaattgagcagctgttaggggtaccagctgtcactacatccggcaactccaaaagcagtggtgcagactgccagccctcacgcccttaccacact
aagctgttctcgcataattacgtacataattctaattgtaataatactggttgagaagtgccgccccctctagtggtatatttcttactgagctctacatacattaccattacgctatatttcaaatg
aacattgaactgctaattagaaattacattaaattaaatgtgtcttcaagtagatccaaaattgattttaaagaattgagcagctgttaggggtgaccagctgtcaccacatccggcaactcc
aaaagcagtggtgcagactgccagcccgtcacgcccttaccacactaaagctgtctcgcattaaaaatttatactgactagatcgaaaaatccaggaaaaagtcgaaaatagccattaaaa
aacagagcagccatgctctatcaacttaccgcaataccacgctcggcaacacactgcaggagacccctc gatgagctgattcag gtgagctatgcccccacaatagctgtccaaacaga
acglatfctaatttcccccattccatalfgtag tacggtcagatcacaccggattggcttcaaggctgctgctcagttcgacaagagcatcaacaatgccctcaaccagcgggtcaaggccc
cgctaaccctcaaggctggaaaactgaacacataccgctctcgcataatgtctggaccctcatgctcaacgatgtggagttccgcagggtccacgagttcgtcaaggtggacaaggtcaag
atcgtggcctgcagcggcaagagcggcgagttctga gccaccagatccgatctgagccccatataccgctatacaccattataatacaacaataggtttaaagatcaatagctgataagct
gggtggccacaaaaaacggaccgtgtgatgcagtaggcgttgcagaataatactgtaattcatagttcaacaagtcgaggattttgtattttatccgtgaaaaactactttgattatagaatt
catagtcatggtgaggagtgatgtgcataaaattgtgttttaggaacgtttgatgtttgtatttgaagaacaacttgaatgcttaattagtttaattagatgtttacaataaacatgtttag
tgcaagtctatagagcgaatgcgatctgctatagatggggcgccgtgtttgagcgaatacgtatctactctggaicccgggattgtgctctttttgtaggggtttctcaggactacgaag
tcgtggcagaagcagacaaaaatcaggttgtgtgtaaggcttttaaaatfagacttctatttccagattttaaaaaagttgctctagccttctttaaattatgatgtaaggtgtcaatgggaat
gggctctagatagataaacttatgctgcgaccgatttcccttttctcctgcacctctattaaccttaccgacctctattcaacattttgaatcaaggctccatgcttctctctccatgg
atatgagttatattttcagcatctgtaacttaacagaatgttagtaccctaaatggttctagctcctactaacttcaacggaactttgagccataaatttatatgtattaaagttaacgacctgc
ttatttgcctctcttttgatgactactgttagtaacagaaccaatgttaaatacctaacttttgggtgatcgtcggattccgaccaactaaatacggctctcacttattttgctcttcttita
ctgacacttacgttgggtgtgtcctccttactcttactgttacttacgtttacagcgcattagcataacagaggggtctcctcgttagtaacagagttagtgtagcaccatcagcggtaagaaaact
gccccactgttactagacagcgtgtctttcgtcgcagcgaaaaaagcaccaccacccccgatttccacctcgtctcggctcttctgtttttcagatgcagtcacactttcaaaaccg
aaaccgaaccgaaaaccaccgccgcatcagcagcgcacgtatttgtgtgtctacgccgttcatcgtcgaacaatttaacaacaaaacaaaaggaaaggcagacactccttcgatttga
aagattgcgactcctaaaggccgagcgaatcgaagcgaatftaaaccgaaaacgcgcgcgagatcggaagaaagccaaacgcccgcgagcttgtttatgtatcggaaaataa
cacaggaaaatccctaaagattctgtgtcggatgagccagtcgaaagcaatacaataataaccgaaagcagattgctgagtaaatcgcattcagaggtaaaaatgcaaatcggagtgta
ttttgagagtggtgtgttagtggtgcaagtgactaaagcggcaaaagtgaaaaagcggaaaagcgggggctcgaagagtggaaggggaaaaactaaagtgattcatatt
gctgtcaatctccgccgtttccactgcagcagaaacgtaataataattacggcgaagcggatcaataaagtgattttcgtcagcccataaaatataaaacttgcgttggcgtcgc
agcagaagcagcagcagaaaaaaaaccaagcagaataataataaaatattctacccccgaattctctcgtgttatttcttctgtttcccaattggactcctcgtcgcggccatcgcctt
taaaatactacttctccttctaggaagtaaaagtcgctgtcaaaagcaattcaaatatccataataatccgctatcattttaaagggttttcaaaaagatcggcaaaatatttccgtcgcatt
aaaatctttacatacaaaactggattataacagatccgttgatttggcactcagcagaaaacaactcggggtaaccaacaaa atggtgaaacggtaagttatcatctagtaacgtaaatgca
tttcagatcgtactatcagtcagacctatgtgtgattgttattccccgatactgcaaatgctgtaaccattttgacagctcaattagcgtctatgccgtcacagt
```

**Fig S7. *Dsuz-TfIIA-S* Rescue fragment fasta file.** Exons in yellow, intron in green, up- and downstream annotated gene neighbors in blue, total length=3802 bp. The *Rescue* fragment was chosen to include sequence from neighboring genes to maximize the likelihood that all regulatory sequences needed for normal expression of the *Rescue* transgene are present.

>*Dsuz-dbe* rescue fragment

```
gagcaaaaaagaattcatcagacgctgacctaaagtcttaacctgtatattttagaagatatgtacatatatagctcagtgtaaaaaataatctgttagccgatcggagtatt
aggctataggctttaaaaatgtaattatatttagggtattccttaacaattgaatataaacttaataggtacattttatctattgggatggcataaagtaagaatgtgtataagaaa
gaagtaaaagattcaaatatcataatTTTTtagggcgtgaaaactgattacagggatgataaactaaacctgaaaaactgataaccagcaactgtgattgggtcg
cactccatttcccgtc gatctggcagctctgccaaaacaagcgtgcaagtatttcacctgtgcagttttatccaaaaaccgaaataatgagcgcagacggaagcgggaag
acactaaagtttagcacggagccgggtggacaatgcgtggccatgaagatcccggcttcaagcaggaggacaacccgcacggcatggtggaagagagctccttcgcc
acgctgttccccaaataccgggagcgatctcaaggaggctggtggccctggtggagcagtgcttgaggagcaccacctaaggcggaaactggacctgatggaggg
cagcatggtggtgaagaccatgtaagacctgggaccctacatcattatcaaggcgaggacatgatcaagctgatggccaggagtggtccctttgagcaggccaa
ggggctctgcaggatgacattgggtgcgacatcatcaaatcggcaatctagccacaagaaggagaagttcgtgaagcggcgccagcgtttgataggcccaacgg
agccacctgaagtccatcgaactgcttaccgactctatgtctgtgtaacagaaacacctctccgcttgggtccatacaaggcctccagcaggtcgggatattgt
cctggaacaatgaacaatgtgcatcccatacaaaccaagccctgatgatcaagcgcgagctgatgaaggatccccgctggccaacgaggattggtctaggttc
ctgccgaagttcaagaacaagaacatcagcaaacgcaagcagccgaaggtgaagaagcagaagaaggagtacatccatcccgccagccggagagcaag
gtggacaagcagttggccagcggagagtacttcccaaccaggagcagaagcagccaagcgggaaccaggagcgcaccgaaaagcagaaggaggcggccaagc
gccaggcgcgagcggccaacaaggactttgtgccgccacggaggagtctgcatctcgaatcgggaagaaggaggatgcctctccacagcaaggtggacgtgaa
ggccctcaaggccaagctgatcaaggccaacaagaaggcggaggagctgtagttttcatagttttaattagccatagattattcaataaaaccgattatgtgagcaagga
aatagaattgaaatcgaagacaatgtttataatggactgcaatagttgttttaacaatTTTTgaaaaagttgtaggaataagtcataatagtcataTTTTaaagtattttgtt
ttcctttgtccaccgcataatttcgagacttatctcagaaaaactattttcatttttaaaaggacttggtaaaaattgtgtgattttcatatttaattgttttaataatgagttttgcg
ttattgaagcttacctttgttttaaaaattcaatttcaattaaatttttaaaaaacggttttaaaatctgatcgttctcaatatgaatatgttagaataaaaaaaattaagctaata
gaatcgcttttttgtaagctacaaaaatattttaaattgcgggaaattataaggacc
```

**Fig S8. *Dsuz-dbe* Rescue fragment fasta file.** Exon in yellow, up- and downstream annotated gene neighbors in blue, total length=1961 bp. The *Rescue* fragment was chosen to include sequence from neighboring genes to maximize the likelihood that all regulatory sequences needed for normal expression of the *Rescue* transgene are present.

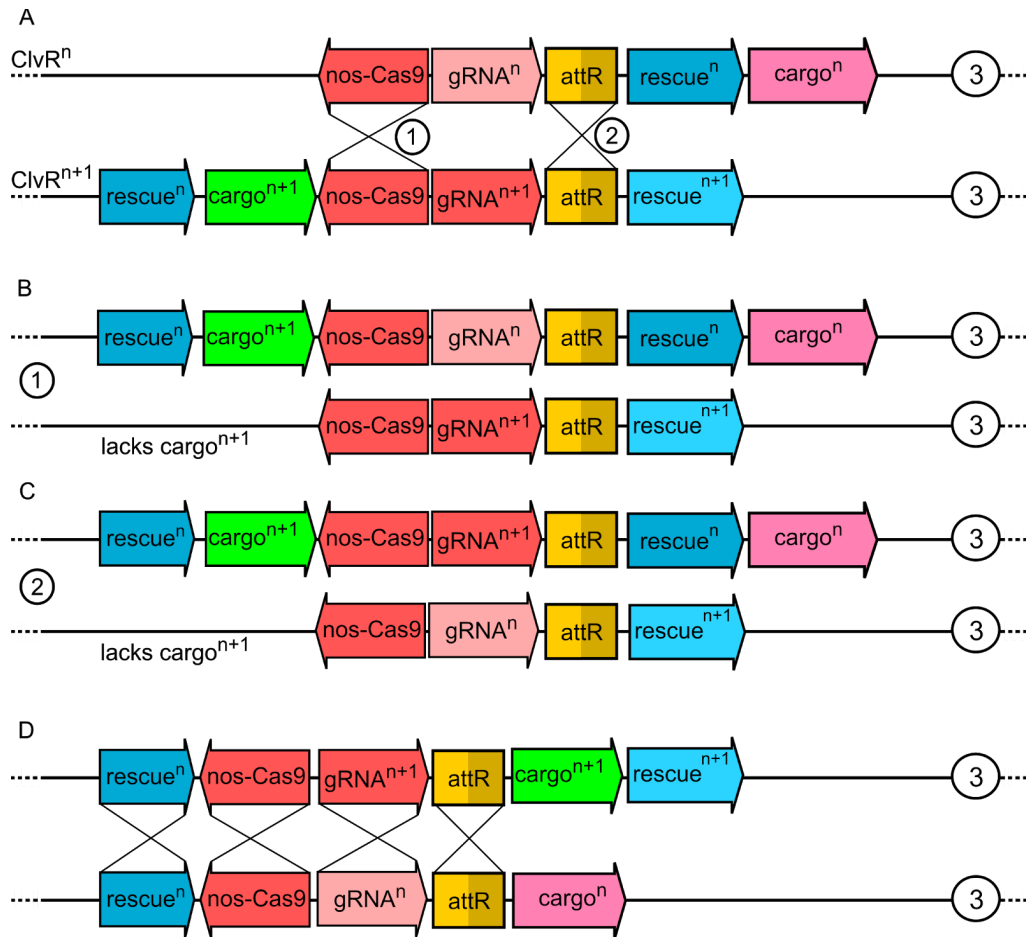

**Fig. S9. Recombination products of  $ClvR^n$  and  $ClvR^{n+1}$ .** (A) Shown are the actual arrangements of components used in this study. Recombination (crossed lines) is to be expected between sequences with high homology. Two important cases are highlighted (circled numbers) with the recombination products drawn out below. The products of most concern are those that carry  $Rescue^{n+1}$  and lack  $cargo^{n+1}$ . While such elements lack gRNAs that can work with Cas9 to drive  $Rescue^{n+1}$  through the population, this activity would be provided by the majority of other elements in the population, which are intact. If the empty  $Rescue^{n+1}$  element had a higher fitness than that of an intact  $cargo^{n+1}$ -bearing element the former would spread at the expense of the latter, resulting in some drive element-bearing individuals that lack the cargo. (B) Recombination event 1 creates a chromosome that lacks  $cargo^{n+1}$ . This chromosome is expected to spread because it carries Cas9 targeting gene n+1 along with a Rescue copy of n+1. However, it lacks  $Rescue^n$  and is therefore at risk of ending up in a fly without functional copies of gene n. This may slow its spread, depending on when during the process of drive it occurs (C) Recombination event 2 creates another chromosome without  $cargo^{n+1}$ . In addition it carries Cas9 targeting gene n but has no  $Rescue$  for gene n and is thus expected to be at risk for loss, as in B. (D) The components of the second generation element are configured such that recombination between regions of homology shared between  $ClvR^n$  and  $ClvR^{n+1}$  has no effect. Recombinant products are either  $ClvR^n$  or  $ClvR^{n+1}$ . Most importantly,  $cargo^{n+1}$  remains tightly linked to  $rescue^{n+1}$ .

## Supplementary Tables

**Table S1: Rates of LOF allele creation in the combined maternal germline and zygote of *ClvR<sup>dbe</sup>* and *ClvR<sup>TPIA-S</sup>*.** We scored the genotype of offspring from a cross of *ClvR/+* heterozygous mothers to wildtype *w<sup>1118</sup>* males. The genotype frequencies of the offspring of these crosses were used to calculate a combined LOF allele creation rate coming from cleavage in the germline and cleavage of the paternal target gene allele due to maternal carry over. Crosses were set up in bottles with ~40 *ClvR/+* virgins each. The 4 presumably wildtype flies (escapers) were analyzed further (see Table S4)

**A) Parental cross: ♀ *ClvR<sup>dbe</sup>* XX ♂ *w<sup>1118</sup>***

| fly bottle   | <i>ClvR<sup>dbe</sup></i> | wildtype | sum         | <i>ClvR</i> frequency (%) | Cleavage to LOF |
|--------------|---------------------------|----------|-------------|---------------------------|-----------------|
| 1            | 851                       | 0        | 851         | 100                       | 100             |
| 2            | 974                       | 1        | 975         | 99.9                      | 99.79           |
| 3            | 894                       | 0        | 894         | 100                       | 100             |
| 4            | 878                       | 1        | 879         | 99.9                      | 99.77           |
| 5            | 668                       | 0        | 668         | 100                       | 100             |
| 6            | 529                       | 0        | 529         | 100                       | 100             |
| 7            | 716                       | 2        | 718         | 99.7                      | 99.44           |
| 8            | 462                       | 0        | 462         | 100                       | 100             |
| <b>total</b> | <b>5972</b>               | <b>4</b> | <b>5976</b> | <b>99.93</b>              | <b>99.87</b>    |

**B) Parental cross: ♀ *ClvR<sup>TPIA-S</sup>* XX ♂ *w<sup>1118</sup>***

| fly bottle   | <i>ClvR<sup>TPIA-S</sup></i> | wildtype | sum         | <i>ClvR</i> frequency (%) | Cleavage to LOF  |
|--------------|------------------------------|----------|-------------|---------------------------|------------------|
| 1            | 679                          | 0        | 679         | 100                       | 100              |
| 2            | 632                          | 0        | 632         | 100                       | 100              |
| 3            | 708                          | 0        | 708         | 100                       | 100              |
| 4            | 588                          | 0        | 588         | 100                       | 100              |
| 5            | 705                          | 0        | 705         | 100                       | 100              |
| <b>total</b> | <b>3312</b>                  | <b>0</b> | <b>3312</b> | <b>&gt;99.97</b>          | <b>&gt;99.94</b> |

**Table S2: Rates of LOF allele creation in the paternal germline.** The target genes of our *ClvR* lines are recessive lethal. To determine rates of cleavage and LOF allele creation in progeny from heterozygous *ClvR/+* males we crossed them to deficiency stocks that completely lacked the target gene locus. The deficiency-bearing chromosome was maintained in trans to a balancer chromosome that is dominantly marked and that is wildtype for the target essential gene. By focusing on the offspring that carry the deficiency we can calculate the rate at which LOF alleles are created in the male germline by dividing the number of flies that carry the deficiency and *ClvR* by half the number of flies that carry the deficiency: male germline LOF allele rate=  $[Df(db e), ClvR^{dbe}] / \text{sum}[Df(db e)/2]$ . The 21 flies that carried the deficiency but not *ClvR* (escapers) were analyzed further below, Table S5)

**A) Parental cross:** ♂ *ClvR<sup>dbe</sup>XX* ♀ *Df(db e)/CyO*

| vial | <i>Df(db e), ClvR<sup>dbe</sup></i> | <i>Df(db e)</i> | <i>CyO, ClvR<sup>dbe</sup></i> | <i>CyO</i> | sum <i>Df(db e)</i> | <i>ClvR</i> frequency (%) | Cleavage to LOF |
|------|-------------------------------------|-----------------|--------------------------------|------------|---------------------|---------------------------|-----------------|
| 1    | 15                                  | 0               | 21                             | 9          | 15                  | 100                       | 100             |
| 2    | 29                                  | 0               | 25                             | 29         | 29                  | 100                       | 100             |
| 3    | 9                                   | 0               | 3                              | 5          | 9                   | 100                       | 100             |
| 4    | 43                                  | 4               | 50                             | 30         | 47                  | 91.5                      | 82.98           |
| 5    | 16                                  | 0               | 15                             | 16         | 16                  | 100                       | 100             |
| 6    | 5                                   | 0               | 7                              | 2          | 5                   | 100                       | 100             |
| 7    | 18                                  | 4               | 25                             | 25         | 22                  | 81.8                      | 63.64           |
| 8    | 23                                  | 0               | 26                             | 25         | 23                  | 100                       | 100             |
| 9    | 31                                  | 0               | 35                             | 28         | 31                  | 100                       | 100             |
| 10   | 17                                  | 0               | 28                             | 26         | 17                  | 100                       | 100             |
| 11   | 14                                  | 0               | 19                             | 29         | 14                  | 100                       | 100             |
| 12   | 34                                  | 2               | 38                             | 33         | 36                  | 94.4                      | 88.89           |
| 13   | 15                                  | 0               | 17                             | 14         | 15                  | 100                       | 100             |
| 14   | 40                                  | 1               | 44                             | 31         | 41                  | 97.6                      | 95.12           |
| 15   | 22                                  | 2               | 24                             | 23         | 24                  | 91.7                      | 83.33           |
| 16   | 33                                  | 0               | 28                             | 28         | 33                  | 100                       | 100             |
| 17   | 33                                  | 0               | 25                             | 15         | 33                  | 100                       | 100             |
| 18   | 21                                  | 0               | 21                             | 27         | 21                  | 100                       | 100             |
| 19   | 43                                  | 4               | 36                             | 42         | 47                  | 91.5                      | 82.98           |
| 20   | 24                                  | 0               | 18                             | 26         | 24                  | 100                       | 100             |
| 21   | 18                                  | 0               | 27                             | 23         | 18                  | 100                       | 100             |
| 22   | 23                                  | 0               | 22                             | 23         | 23                  | 100                       | 100             |
| 23   | 26                                  | 1               | 27                             | 35         | 27                  | 96.3                      | 92.60           |
| 24   | 31                                  | 0               | 35                             | 40         | 31                  | 100                       | 100             |

|              |            |           |            |            |            |             |              |
|--------------|------------|-----------|------------|------------|------------|-------------|--------------|
| 25           | 19         | 0         | 13         | 25         | 19         | 100         | 100          |
| 26           | 19         | 0         | 19         | 18         | 19         | 100         | 100          |
| 27           | 27         | 0         | 20         | 26         | 27         | 100         | 100          |
| 28           | 20         | 2         | 32         | 33         | 22         | 90.9        | 81.82        |
| 29           | 12         | 0         | 18         | 18         | 12         | 100         | 100          |
| 30           | 29         | 0         | 22         | 35         | 29         | 100         | 100          |
| 31           | 29         | 1         | 38         | 39         | 30         | 96.7        | 93.33        |
| 32           | 20         | 0         | 20         | 21         | 20         | 100         | 100          |
| 33           | 18         | 0         | 20         | 19         | 18         | 100         | 100          |
| <b>total</b> | <b>776</b> | <b>21</b> | <b>818</b> | <b>818</b> | <b>797</b> | <b>97.4</b> | <b>94.73</b> |

**B) Parental cross: ♂ *ClvR<sup>TfIIA-S</sup>* XX ♀ *Df(TfIIA-S)/TM6B,Tb***

| vial | <i>Df(TfIIA-S)/ClvR<sup>TfIIA-S</sup></i> | <i>Df(TfIIA-S)</i> | <i>ClvR<sup>TfIIA-S</sup>/TM6B,<br/>Tb</i> | <i>TM6B,Tb</i> | sum<br><i>Df(TfIIA-S)</i> | <i>ClvR</i><br>frequency<br>(%) | Cleavage to LOF |
|------|-------------------------------------------|--------------------|--------------------------------------------|----------------|---------------------------|---------------------------------|-----------------|
| 1    | 32                                        | 0                  | 27                                         | 26             | 32                        | 100                             | 100             |
| 2    | 20                                        | 0                  | 28                                         | 21             | 20                        | 100                             | 100             |
| 3    | 26                                        | 1                  | 28                                         | 32             | 27                        | 96.3                            | 92.60           |
| 4    | 34                                        | 0                  | 36                                         | 23             | 34                        | 100                             | 100             |
| 5    | 27                                        | 0                  | 28                                         | 26             | 27                        | 100                             | 100             |
| 6    | 34                                        | 0                  | 29                                         | 24             | 34                        | 100                             | 100             |
| 7    | 29                                        | 0                  | 35                                         | 35             | 29                        | 100                             | 100             |
| 8    | 13                                        | 0                  | 36                                         | 27             | 13                        | 100                             | 100             |
| 9    | 19                                        | 0                  | 16                                         | 15             | 19                        | 100                             | 100             |
| 10   | 23                                        | 0                  | 10                                         | 13             | 23                        | 100                             | 100             |
| 11   | 28                                        | 0                  | 27                                         | 24             | 28                        | 100                             | 100             |
| 12   | 3                                         | 0                  | 2                                          | 3              | 3                         | 100                             | 100             |
| 13   | 32                                        | 0                  | 42                                         | 37             | 32                        | 100                             | 100             |
| 14   | 26                                        | 0                  | 20                                         | 18             | 26                        | 100                             | 100             |
| 15   | 36                                        | 0                  | 41                                         | 31             | 36                        | 100                             | 100             |
| 16   | 19                                        | 0                  | 17                                         | 19             | 19                        | 100                             | 100             |
| 17   | 26                                        | 0                  | 32                                         | 31             | 26                        | 100                             | 100             |
| 18   | 11                                        | 0                  | 13                                         | 10             | 11                        | 100                             | 100             |
| 19   | 24                                        | 0                  | 31                                         | 30             | 24                        | 100                             | 100             |

|              |            |          |            |            |            |             |              |
|--------------|------------|----------|------------|------------|------------|-------------|--------------|
| 20           | 35         | 0        | 42         | 31         | 35         | 100         | 100          |
| 21           | 30         | 0        | 31         | 34         | 30         | 100         | 100          |
| 22           | 11         | 1        | 21         | 18         | 12         | 91.7        | 83.33        |
| 23           | 28         | 0        | 24         | 27         | 28         | 100         | 100          |
| 24           | 34         | 0        | 32         | 28         | 34         | 100         | 100          |
| 25           | 23         | 0        | 23         | 24         | 23         | 100         | 100          |
| 26           | 31         | 0        | 27         | 22         | 31         | 100         | 100          |
| 27           | 18         | 0        | 25         | 24         | 18         | 100         | 100          |
| <b>total</b> | <b>672</b> | <b>2</b> | <b>723</b> | <b>653</b> | <b>674</b> | <b>99.7</b> | <b>99.41</b> |

**Table S3: Rates of LOF allele creation in the combined maternal germline and zygote of the second generation *ClvR* elements *ClvR<sup>dbe</sup>+R<sup>tko</sup>* and *ClvR<sup>tko</sup>+R<sup>dbe</sup>*.** We scored the genotype of offspring from a cross of (*ClvR<sup>n+1</sup>+R<sup>n</sup>*)/+ heterozygous mothers to wildtype *w<sup>1118</sup>* males. The genotype frequencies of the offspring of these crosses were used to calculate a combined LOF allele rate coming from cleavage in the germline and cleavage of the paternal target gene allele due to maternal carry over. Crosses were set up in bottles with ~40 (*ClvR<sup>n+1</sup>+R<sup>n</sup>*)/+ virgins each.

**A) Parental cross:** ♀(*ClvR<sup>dbe</sup>+R<sup>tko</sup>*)/+ XX ♂*w<sup>1118</sup>*

| fly bottle   | <i>ClvR<sup>dbe</sup>+R<sup>tko</sup></i> | wildtype | sum         | <i>ClvR</i> frequency (%) | Cleavage to LOF  |
|--------------|-------------------------------------------|----------|-------------|---------------------------|------------------|
| 1            | 1138                                      | 0        | 1138        | 100                       | 100              |
| 2            | 1053                                      | 0        | 1053        | 100                       | 100              |
| 3            | 812                                       | 0        | 812         | 100                       | 100              |
| <b>total</b> | <b>3003</b>                               | <b>0</b> | <b>3003</b> | <b>&gt;99.97</b>          | <b>&gt;99.87</b> |

**B) Parental cross:** ♀(*ClvR<sup>tko</sup>+R<sup>dbe</sup>*)/+ XX ♂*w<sup>1118</sup>*

| fly bottle   | <i>ClvR<sup>tko</sup>+R<sup>dbe</sup></i> | wildtype | sum         | <i>ClvR</i> frequency (%) | Cleavage to LOF   |
|--------------|-------------------------------------------|----------|-------------|---------------------------|-------------------|
| 1            | 1106                                      | 0        | 1106        | 100                       | 100               |
| 2            | 1329                                      | 0        | 1329        | 100                       | 100               |
| 3            | 1164                                      | 0        | 1164        | 100                       | 100               |
| <b>total</b> | <b>3599</b>                               | <b>0</b> | <b>3599</b> | <b>&gt;99.97</b>          | <b>&gt;99.89%</b> |



**Table S4: Analysis of escapers from crosses of heterozygous *ClvR<sup>dbe/+</sup>* females to *w<sup>1118</sup>* in Table S1.**

Out of 5972 flies scored we found 4 flies that did not carry the *ClvR* marker. We crossed all 4 of them again to heterozygous *ClvR/+* females to test whether the escaper chromosomes remained sensitive to *ClvR*. Results of this cross are in the last 3 columns of the table below. After allowing the escaper flies to mate we extracted genomic DNA and sequenced over the gRNA target sites. Sequencing results are shown in the table below. '+' indicates an unaltered target site, del indicates a deletion followed by the number of deleted bp. One fly died for which we couldn't obtain a sequencing signal. The other three had a common 3bp in frame deletion at the target site for gRNA4. Two of these flies had an additional 3bp in frame deletion at target site for gRNA3. Target sites for gRNA1 and gRNA2 were unaltered. Backcrosses of these flies to *ClvR/+* females showed that the escaper chromosome could still be cleaved/mutated (Cleavage to LOF of 93.75 and 100%, 1 fly was sterile).

| Fly ID | gRNA1     | gRNA2 | gRNA3   | gRNA4   | tomato+ | tomato- | <i>ClvR</i> frequency (%) | Cleavage to LOF |
|--------|-----------|-------|---------|---------|---------|---------|---------------------------|-----------------|
| 2.1    | +         | +     | 3bp del | 3bp del | 62      | 2       | 96.88                     | 93.75           |
| 4.1    | no signal | +     | 3bp del | 3bp del | sterile | sterile | NA                        | NA              |
| 6.1    | +         | +     | +       | 3bp del | 51      | 0       | 100                       | 100             |

**Table S5: Analysis of escapers from crosses of heterozygous *ClvR<sup>dbe</sup>/+* and *ClvR<sup>TjIIA-S</sup>/+* males to the deficiency strains from Table S2.** For the cross of ♂ *ClvR<sup>dbe</sup>* XX *Df(dbe)/CyO* we found 21 escapers among 2433 flies scored. For the cross of ♂ *ClvR<sup>TjIIA-S</sup>* XX *Df(TjIIA-S)/TM3,Tb* we found 2 escapers among 2050 flies scored. We extracted genomic DNA from all of the escapers and sequenced over the target region. In addition, male escapers were backcrossed to heterozygous *ClvR*-bearing females to check whether the escaper chromosome could still be cleaved and mutated to LOF. Results are summarized in the table below. ‘+’ stands for unaltered target site, SNP is likely a pre-existing polymorphism in the target site, ‘del’ stands for deletion followed by the number of deleted bases, ‘sub’ stands for substitution of bases. The last four columns show the results of the backcrosses of male escapers to heterozygous *ClvR*/+ females to check whether the escaped target locus could still be cleaved. For the 21 escapers coming from male *ClvR<sup>dbe</sup>/+* fathers, we found a 3bp in frame deletion at the target site for gRNA4 in five flies. One fly had a polymorphism at the target site of gRNA3 and one fly had a 2bp substitution at target site of gRNA3. All other target sites were unaltered. 12 of the 21 flies were males, which were backcrossed to *ClvR*/+ females. In one of these crosses the cleavage rate to LOF was 85%, for all the others it was 100% (see Table S5A), again showing that the escaper chromosomes were not resistant to Cas9 cleavage. The 2 escapers coming from *ClvR<sup>TjIIA-S</sup>* fathers had a polymorphism at the target site of gRNA2, while all the other target sites remained unaltered. When the 2 escapers were backcrossed to *ClvR*/+ females, the cleavage rate to LOF in the progeny was 100% (Table S5B).

**A) *ClvR<sup>dbe</sup>***

| Fly ID | gRNA1 | gRNA2 | gRNA3 | gRNA4   | tomato+ | tomato- | <i>ClvR</i> frequency(%) | Cleavage to LOF | notes  |
|--------|-------|-------|-------|---------|---------|---------|--------------------------|-----------------|--------|
| 4.1    | +     | +     | +     | +       | 74      | 0       | 100                      | 100             | male   |
| 4.2    | +     | +     | +     | +       | 64      | 0       | 100                      | 100             | male   |
| 4.3    | +     | +     | +     | 3bp del | NA      | NA      | NA                       | NA              | female |
| 4.4    | +     | +     | +     | +       | 71      | 0       | 100                      | 100             | male   |
| 7.1    | +     | +     | SNP   | 3bp del | NA      | NA      | NA                       | NA              | female |
| 7.2    | +     | +     | +     | +       | 76      | 0       | 100                      | 100             | male   |
| 7.3    | +     | +     | +     | +       | 53      | 4       | 93.0                     | 84.9            | male   |
| 7.4    | +     | +     | +     | +       | NA      | NA      | NA                       | NA              | female |
| 12.1   | +     | +     | +     | +       | NA      | NA      | NA                       | NA              | female |
| 12.2   | +     | +     | +     | +       | 66      | 0       | 100                      | 100             | male   |
| 14.1   | +     | +     | +     | 3bp del | NA      | NA      | NA                       | NA              | female |
| 15.1   | +     | +     | +     | +       | sterile | sterile | NA                       | NA              | male   |

|      |   |   |         |         |    |    |     |     |        |
|------|---|---|---------|---------|----|----|-----|-----|--------|
| 15.2 | + | + | +       | +       | 54 | 0  | 100 | 100 | male   |
| 19.1 | + | + | 2bp sub | +       | NA | NA | NA  | NA  | female |
| 19.2 | + | + | +       | +       | NA | NA | NA  | NA  | female |
| 19.3 | + | + | +       | 3bp del | 77 | 0  | 100 | 100 | male   |
| 19.4 | + | + | +       | 3bp del | 71 | 0  | 100 | 100 | male   |
| 23.1 | + | + | +       | +       | NA | NA | NA  | NA  | female |
| 28.1 | + | + | +       | +       | 68 | 0  | 100 | 100 | male   |
| 28.2 | + | + | +       | +       | 61 | 0  | 100 | 100 | male   |
| 31.1 | + | + | +       | +       | 66 | 0  | 100 | 100 | male   |

**B) *ClvR<sup>TPIA-S</sup>***

| Fly ID | gRNA<br>1 | gRNA2 | gRNA3 | gRNA4 | tomato+ | tomato- | <i>ClvR</i> frequency<br>(%) | Cleavage to<br>LOF | notes |
|--------|-----------|-------|-------|-------|---------|---------|------------------------------|--------------------|-------|
| 3.1    | +         | SNP   | +     | +     | 71      | 0       | 100                          | 100                | male  |
| 22.1   | +         | SNP   | +     | +     | 89      | 0       | 100                          | 100                | male  |

**Table S6: Cleavage events in chromosomes exposed to *ClvR<sup>dbe</sup>* for the first time.** We sequenced the target locus of *ClvR<sup>dbe</sup>* flies in a chromosome that was exposed to *ClvR<sup>dbe</sup>* for the first time. The crossing scheme to obtain these flies is provided below. We started with the cross to determine the male germline cleavage rate to LOF by crossing ♂*ClvR<sup>dbe</sup>* XX ♀*Df(dbe)/CyO* (Data in Table S2). This cross produced ♀*dbe<sup>-</sup>/CyO;ClvR<sup>dbe</sup>*. The *CyO* balancer chromosome came from the deficiency stock and is now exposed to the *ClvR* element for the first time. Next we backcrossed these females again to males of the deficiency stock: ♀*dbe<sup>-</sup>/CyO;ClvR<sup>dbe</sup>* XX ♂*Df<sup>dbe</sup>/CyO*. Among the progeny of this cross were flies that had the *CyO* balancer chromosome of the mother in trans to the deficiency from the father. Flies with that genotype were used to sequence over the target region on the *CyO* balancer chromosome. To simplify the scheme below it is assumed that *ClvR<sup>dbe</sup>* always creates mutations at the wildtype *dbe* locus, indicated as *dbe<sup>-</sup>*.

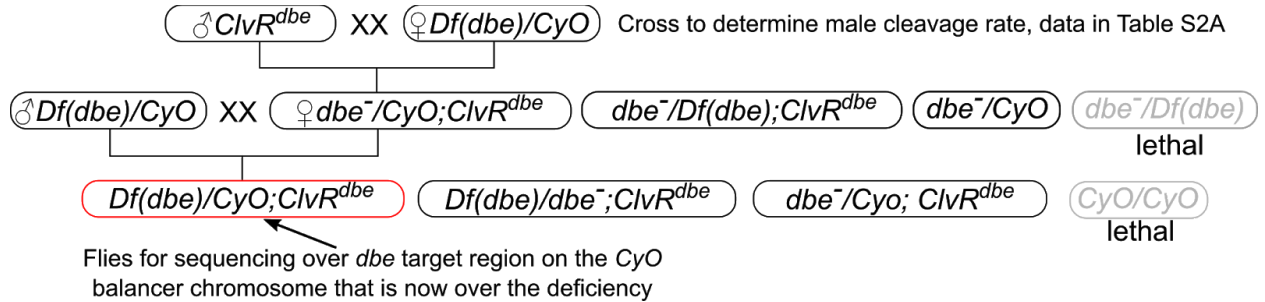

#### Sequencing results of *Df(dbe)/CyO;ClvR<sup>dbe</sup>* flies:

| Fly ID | gRNA1                     | gRNA2     | gRNA3                   | gRNA4         |
|--------|---------------------------|-----------|-------------------------|---------------|
| 27     | +                         | SNP       | del between gRNA3 and 4 |               |
| 28     | +                         | SNP       | 2bp indel               | 37bp del      |
| 29     | +                         | SNP       | 9bp del                 | 8bp del       |
| 30     | +                         | SNP       | 11bp insertion          | 6bp del       |
| 31     | +                         | SNP       | +                       | +             |
| 32     | del between gRNA1 and 2-3 |           | 9bp del                 | 3bp del       |
| 33     | 17bp del                  | 6bp del   | 4bp del                 | 4bp indel     |
| 34     | +                         | SNP       | del between gRNA3 and 4 |               |
| 35     | 3bp del                   | 5bp indel | 11bp insertion          | 3bp del       |
| 36     | +                         | SNP       | del between gRNA3 and 4 |               |
| 37     | +                         | SNP       | +                       | +             |
| 38     | +                         | SNP       | 11bp insertion          | 3bp del       |
| 39     | +                         | SNP       | 11bp indel              | 38 bp del     |
| 40     | +                         | SNP       | 3 bp indel              | 7bp del       |
| 41     | +                         | SNP       | 13 bp deletion          | 5bp insertion |
| 42     | +                         | SNP       | 4 bp deletion           | 2bp deletion  |

**Table S7: Cleavage events in chromosomes of *ClvR<sup>dbe</sup>* drive populations after 22 Generations.** We took 4 flies of each drive replicate bottle, crossed them individually to the deficiency stock, and sequenced progeny of this cross that had a presumably cleaved/mutated *dbe* locus in trans to the deficiency. Sequencing results are summarized in the table below.

| Fly ID | gRNA1          | gRNA2         | gRNA3                   | gRNA4    | notes                                      |
|--------|----------------|---------------|-------------------------|----------|--------------------------------------------|
| D1     | ***            | 1bp del       | 39bp del                | ***      | inversion of locus between gRNA1 and gRNA4 |
| D2     | ***            | ***           | ***                     | ***      | whole locus deleted                        |
| D3     | 3bp del        | 4bp del       | 21bp del                | 2bp del  |                                            |
| D4     | 3bp del        | 21bp indel    | 11bp insertion          | 2bp del  |                                            |
| D5     | 3bp del        | 6bp indel     | 4bp del                 | 3bp del  |                                            |
| D6     | 10bp del       | 6bp del       | 11bp insertion          | 3bp del  |                                            |
| D7     | 11bp insertion | 3bp insertion | 11bp insertion          | 3bp del  |                                            |
| D8     | 11bp indel     | 3bp del       | del between gRNA3 and 4 |          |                                            |
| D9     | 3bp del        | 10bp indel    | 2bp del                 | 44bp del |                                            |
| D10    | 24bp del       | 8bp indel     | del between gRNA3 and 4 |          |                                            |
| D11    | 3bp del        | 2bp del       | del between gRNA3 and 4 |          |                                            |
| D12    | 7bp del        | 28bp indel    | 9bp indel               | 4bp del  |                                            |
| D13    | 25bp del       | 3bp indel     | 9bp indel               | 3bp del  |                                            |
| D14    | NS             | NS            | NS                      | NS       | no signal                                  |
| D15    | 48bp del       | 4bp del       | 9bp indel               | 3bp del  |                                            |
| D16    | ***            | 1bp del       | 39bp del                | ***      | inversion of locus between gRNA1 and gRNA4 |

**Table S8: Cleavage events in chromosomes exposed to *ClvR<sup>TfIIA-S</sup>*.** For *ClvR<sup>TfIIA-S</sup>*, the *ClvR* selfish element as well as the target gene are located on the same chromosome. Therefore, we could not set up crosses easily where it would be clear that the cleaved target locus was only generated in that generation. However, as an attempt to generate what were likely new mutations at the *TfIIA-S* locus we took heterozygous *ClvR/+* females and outcrossed them to *w<sup>1118</sup>* males for 5 generations. We then crossed *ClvR/+* females to a deficiency strain for the *TfIIA-S* locus and sequenced the target locus in progeny that were *ClvR<sup>TfIIA-S</sup>/Df*. Results are summarized in the following table.

| Fly ID | gRNA1                            | gRNA2             | gRNA3     | gRNA4    | notes     |
|--------|----------------------------------|-------------------|-----------|----------|-----------|
| 1      | 3bp del                          | 2bp ins, 3 bp sub | 19bp del  | 8bp del  |           |
| 2      | del between gRNA1 and gRNA2      |                   | 19 bp del | 26bp del |           |
| 3      | 9bp del                          | 2bp del           | 11bp del  | 8bp del  |           |
| 4      | deletion between gRNA1 and gRNA4 |                   |           |          |           |
| 5      | 3bp del                          | 2bp ins, 3 bp sub | 19bp del  | 8bp del  |           |
| 6      | del between gRNA1 and gRNA2      |                   | 19 bp del | 26bp del |           |
| 7      | del between gRNA1 and gRNA2      |                   | 19 bp del | 26bp del |           |
| 8      | del between gRNA1 and gRNA2      |                   | 19 bp del | 26bp del |           |
| 9      | del between gRNA1 and gRNA2      |                   | 19 bp del | 26bp del |           |
| 10     | del between gRNA1 and gRNA2      |                   | 19 bp del | 26bp del |           |
| 11     | del between gRNA1 and gRNA2      |                   | 19 bp del | 26bp del |           |
| 12     | 9bp del                          | 2bp del           | 11bp del  | 8bp del  |           |
| 13     | NS                               | NS                | NS        | NS       | no signal |
| 14     | del between gRNA1 and gRNA2      |                   | 19 bp del | 26bp del |           |
| 15     | del between gRNA1 and gRNA2      |                   | 19 bp del | 26bp del |           |
| 16     | del between gRNA1 and gRNA2      |                   | 19 bp del | 26bp del |           |

**Table S9: Cleavage events in chromosomes of *ClvR<sup>TjIIA-S</sup>* drive populations after 22 Generations.** We took 4 flies from each drive replicate bottle, crossed them individually to the *Df* stock for the *TjIIA-S* region, and sequenced progeny of this cross that were *ClvR<sup>TjIIA-S</sup>* and carried the *Df* chromosome. These flies presumably had a cleaved *TjIIA-S* locus in trans to the deficiency. Sequencing results are summarized in the table below.

| Fly ID | gRNA1                                     | gRNA2   | gRNA3                   | gRNA4     | notes     |
|--------|-------------------------------------------|---------|-------------------------|-----------|-----------|
| T1     | 3bp del                                   | 6bp del | 11bp del                | 30bp del  |           |
| T2     | del between gRNA1 and 2                   |         | 19bp del                | 26 bp del |           |
| T3     | del between gRNA1 and 2                   |         | 19bp del                | 26 bp del |           |
| T4     | del between gRNA1 and 2                   |         | 19bp del                | 26 bp del |           |
| T5     | del between gRNA1 and 2                   |         | 19bp del                | 26 bp del |           |
| T6     | del between gRNA1 and 2                   |         | 19bp del                | 26 bp del |           |
| T7     | del between gRNA1 and 2                   |         | 19bp del                | 26 bp del |           |
| T8     | del between gRNA1 and 2                   |         | 19bp del                | 26 bp del |           |
| T9     | NS                                        | NS      | NS                      | NS        | no signal |
| T10    | del between gRNA1 and 2                   |         | 19bp del                | 26 bp del |           |
| T11    | del between gRNA1 and 2                   |         | 19bp del                | 26 bp del |           |
| T12    | del between gRNA1 and 2                   |         | 19bp del                | 26 bp del |           |
| T13    | del between 1.1kb upstream of gRNA1 and 3 |         |                         | 3bp del   |           |
| T14    | del between gRNA1 and 2                   |         | 19bp del                | 26 bp del |           |
| T15    | del between gRNA1 and 2                   |         | 19bp del                | 4bp del   |           |
| T16    | 2bp del                                   | 1bp del | del between gRNA3 and 4 |           |           |

**Table S10: Allele frequency of *ClvR* elements in gene drive experiments.** The number of *ClvR* homozygotes and heterozygotes in different gene drive populations was determined by outcrossing 100 males from each gene drive bottle to *w<sup>1118</sup>* females. If 100% of the progeny of these crosses carried the *ClvR<sup>n</sup>* marker, the male was homozygous for *ClvR<sup>n</sup>*. If half carried the *ClvR<sup>n</sup>* marker the father was heterozygous. In addition, virgins were collected from the bottles at the assayed generations and used to seed the *ClvR<sup>n</sup>+R<sup>n-1</sup>* drive experiments presented in Fig. 4.

| <i>ClvR</i> target | Replicate | Generation | <i>ClvR<sup>n</sup></i> allele frequency [%] |
|--------------------|-----------|------------|----------------------------------------------|
| <i>dbe</i>         | A         | 22         | 90.43                                        |
| <i>dbe</i>         | B         | 22         | 82.76                                        |
| <i>dbe</i>         | C         | 22         | 87.36                                        |
| <i>dbe</i>         | D         | 22         | 89.20                                        |
| <i>TfIIA-S</i>     | A         | 22         | 91.07                                        |
| <i>TfIIA-S</i>     | B         | 22         | 93.75                                        |
| <i>TfIIA-S</i>     | C         | 22         | 94.71                                        |
| <i>TfIIA-S</i>     | D         | 22         | 95.70                                        |
| <i>tko</i>         | A         | 32         | 93.96                                        |
| <i>tko</i>         | B         | 32         | 95.60                                        |
| <i>tko</i>         | C         | 32         | 97.65                                        |
| <i>tko</i>         | D         | 32         | 100.00                                       |
| <i>tko</i>         | E         | 32         | 100.00                                       |



**Table S11. Allele frequencies of  $ClvR^{n+1}+R^n$ ,  $ClvR^n$ , and wildtype in 2nd generation  $ClvR$  gene drive experiments at generation 12.** The allele frequencies in these gene drive populations was determined by outcrossing 100 males from each gene drive bottle to  $w^{1118}$  females. If 100% of the progeny of these crosses carried the  $ClvR^{n+1}+R^n$  marker, the male was homozygous for  $ClvR^{n+1}+R^n$ . If half carried the  $ClvR^n$  marker but not  $ClvR^{n+1}+R^n$  the father was transheterozygous for the 2nd and 1st generation  $ClvR$  element. If half carried no marker the father was heterozygous. Starting allele frequency for  $ClvR^{n+1}+R^n$  at generation 0 in all gene drive experiments was 25% (starting allele frequencies of  $ClvR^n$  are in Table S10). Note how  $ClvR^{n+1}+R^n$  increases in frequency at the cost of  $ClvR^n$ . Phenotype frequencies are plotted in Fig. 4 (green lines).

A) Allele frequencies of  $ClvR^{dbe}+R^{tko}$  driving into a population of  $ClvR^{tko}$  at generation 12 in Fig.4A (green lines)

| Replicate | Allele frequencies (%) |              |          |
|-----------|------------------------|--------------|----------|
|           | $ClvR^{dbe}+R^{tko}$   | $ClvR^{tko}$ | wildtype |
| A         | 91.18                  | 8.24         | 0.59     |
| B         | 87.18                  | 12.82        | 0.00     |
| C         | 90.24                  | 9.15         | 0.61     |
| D         | 87.36                  | 12.64        | 0.00     |

B) Allele frequencies of  $ClvR^{tko}+R^{dbe}$  driving into a population of  $ClvR^{dbe}$  at generation 12 in Fig. 4B (green lines)

| Replicate | Allele frequencies (%) |              |          |
|-----------|------------------------|--------------|----------|
|           | $ClvR^{tko}+R^{dbe}$   | $ClvR^{dbe}$ | wildtype |
| A         | 84.88                  | 14.53        | 0.58     |
| B         | 88.46                  | 10.44        | 1.10     |
| C         | 88.61                  | 10.76        | 0.63     |
| D         | 85.00                  | 13.33        | 1.67     |

**Table S12. Allele frequencies of  $ClvR^{n+1}+R^n$  driving into populations of  $w^{1118}$  at generation 12.** The allele frequencies in these gene drive populations was determined by outcrossing 100 males from each gene drive bottle to  $w^{1118}$  females. If 100% of the progeny carried the  $ClvR^{n+1}+R^n$  marker, the male was homozygous for  $ClvR^{n+1}+R^n$ . If half carried no marker the father was heterozygous. Starting allele frequency for  $ClvR^{n+1}+R^n$  at generation 0 in all gene drive experiments was 25%. Note how  $ClvR^{n+1}+R^n$  increases in frequency at the cost wildtype ( $w^{1118}$ ). Phenotype frequencies are plotted in Fig. 4 (red lines)

A) Allele frequencies of  $ClvR^{dbe}+R^{tko}$  driving into a population of  $w^{1118}$  at generation 12 in Fig.4A (red lines)

|           | Allele frequencies (%) |          |
|-----------|------------------------|----------|
| Replicate | $ClvR^{dbe}+R^{tko}$   | wildtype |
| A         | 84.76                  | 15.24    |
| B         | 81.33                  | 18.67    |
| C         | 84.83                  | 15.17    |
| D         | 87.34                  | 12.66    |

B) Allele frequencies of  $ClvR^{tko}+R^{dbe}$  driving into a population of  $w^{1118}$  at generation 12 in Fig. 4B (red lines)

|           | Allele frequencies (%) |          |
|-----------|------------------------|----------|
| Replicate | $ClvR^{tko}+R^{dbe}$   | wildtype |
| A         | 83.73                  | 16.27    |
| B         | 87.67                  | 12.33    |
| C         | 82.72                  | 17.28    |
| D         | 86.14                  | 13.86    |
